# Supplementary material
Source: publisher figshare collection journal article supplement (https://frontiersin.figshare.com/ndownloader/files/40930169)
Supplement: Supplementary file [file 40930169]

Supplementary

Physiological and Transcriptional Studies Reveal Cr(VI)  
Reduction Mechanisms in the Exoelectrogen *Cellulomonas fimi*  
Clb-11

Lianbin Cao, Mingguo Lu, Mengrui Zhao, Yifan Zhang, Yiping Nong, Mengxue Hu, Ya Wang,  
Tongbiao Li, Fujia Chen, Mingcheng Wang, Junhe Liu, Enzhong Li\* and Hongmei Sun\*  
School of Biological and Food Engineering, Huanghuai University, No. 76 Kaiyuan Road,  
Zhumadian, Henan Province 463000, PR China

The complete genome sequence of *Cellulomonas fimi* Clb-11 has been deposited in  
the NCBI database under accession number CP110680.

---

\* Corresponding author.

Current address: School of Biological and Food Engineering, Huanghuai University, No. 76 Kaiyuan Road,  
Zhumadian, Henan Province 463000, PR China. E-mail address: shm58@163.com

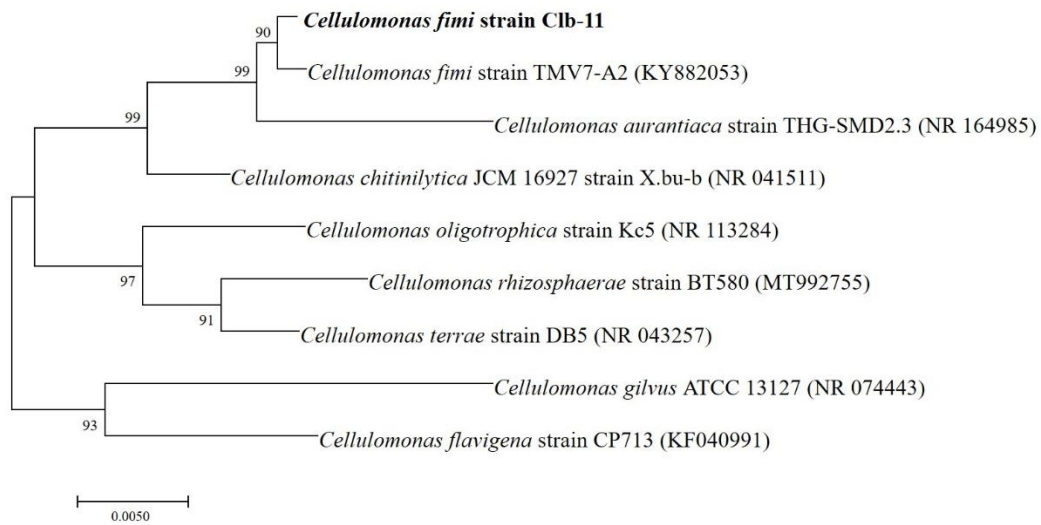

**Fig. S1** Phylogenetic tree of *C. fimi* strain Clb-11 with closely related species based on 16S rDNA gene sequences. Numbers at each node present the percentages of occurrence of the branching order in 1,000 bootstrapped trees for values greater than 50%. The scale bar represents 0.5% divergence.

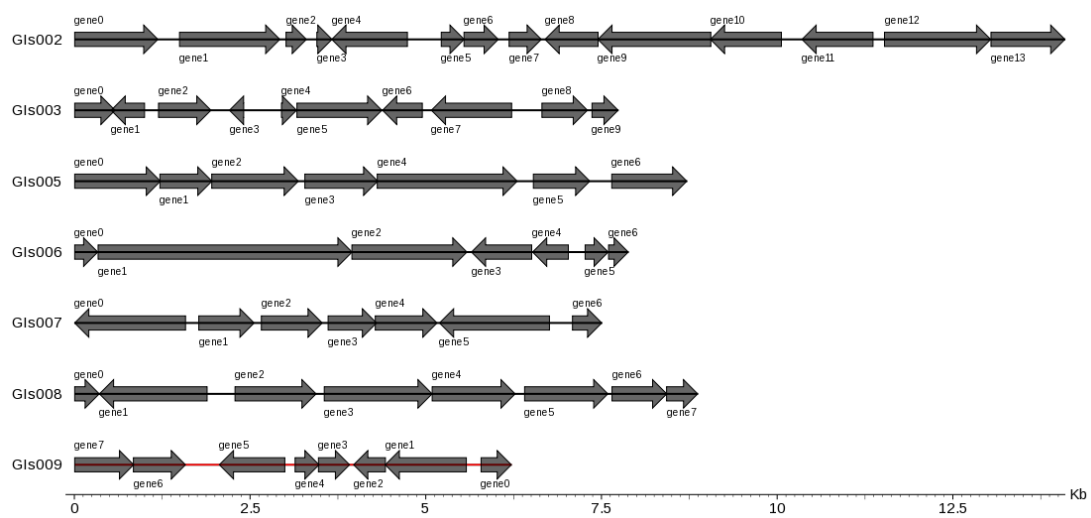

**Fig. S2** Genomics island (GI) gene distribution statistical maps of *C. fimi* strain Clb-11.

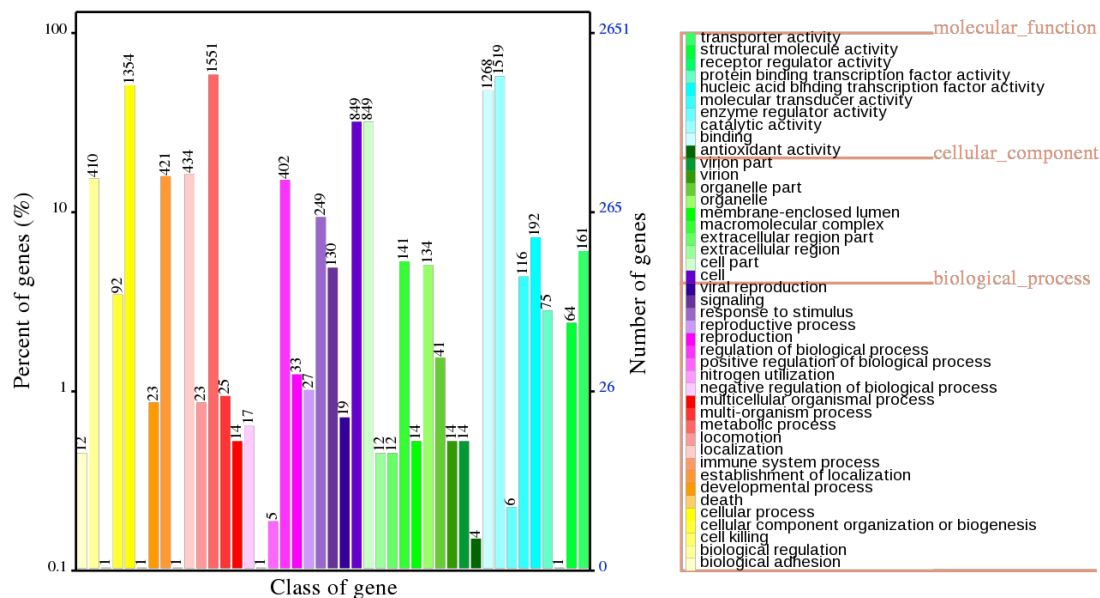

**Fig. S3** Gene function annotation of *C. fimi* strain Clb-11 by Gene Ontology (GO).

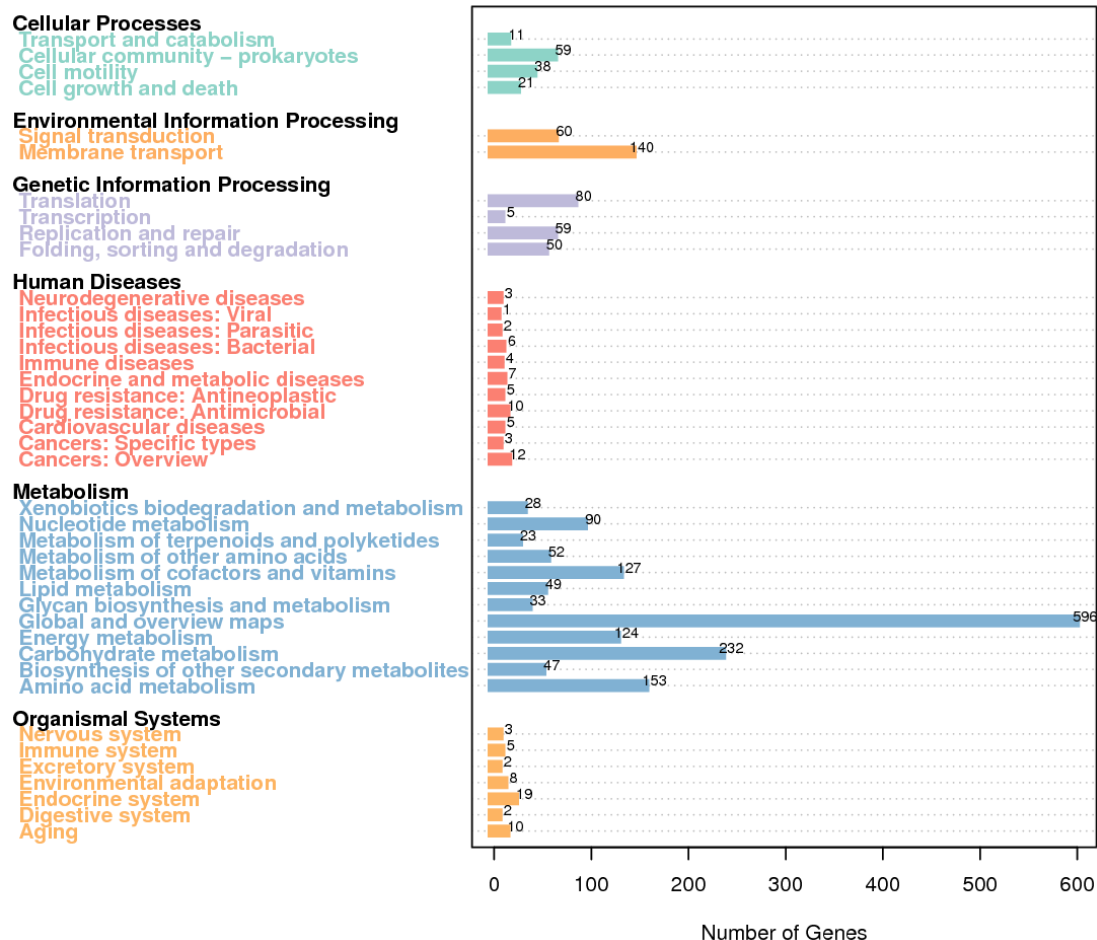

**Fig. S4** Gene function annotation of *C. fimi* strain Clb-11 in eight biological pathway classifications by Kyoto Encyclopedia of Genes and Genomes (KEGG).

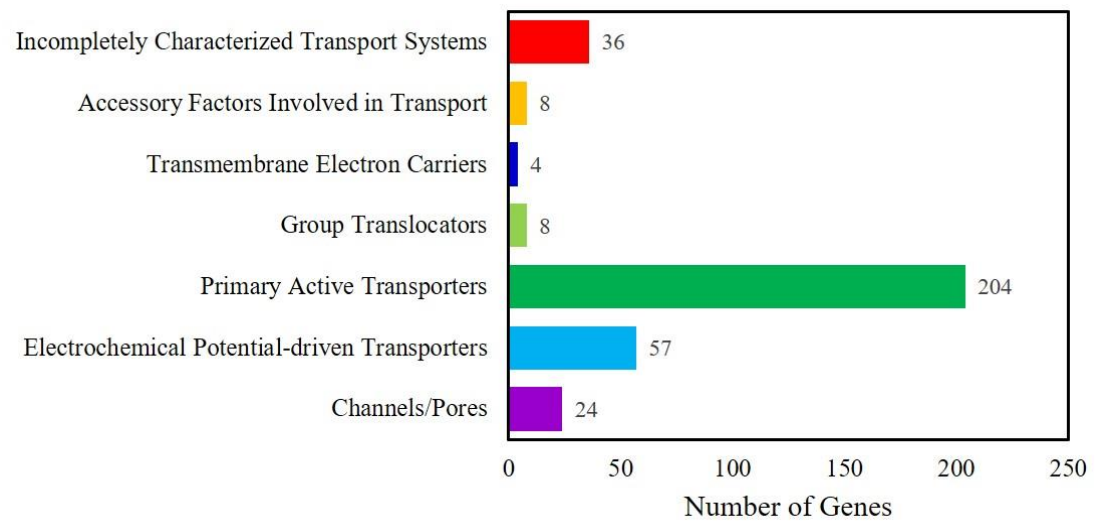

**Fig. S5** Gene function annotation of *C. fimi* strain Clb-11 by the Transporter Classification Database (TCDB).

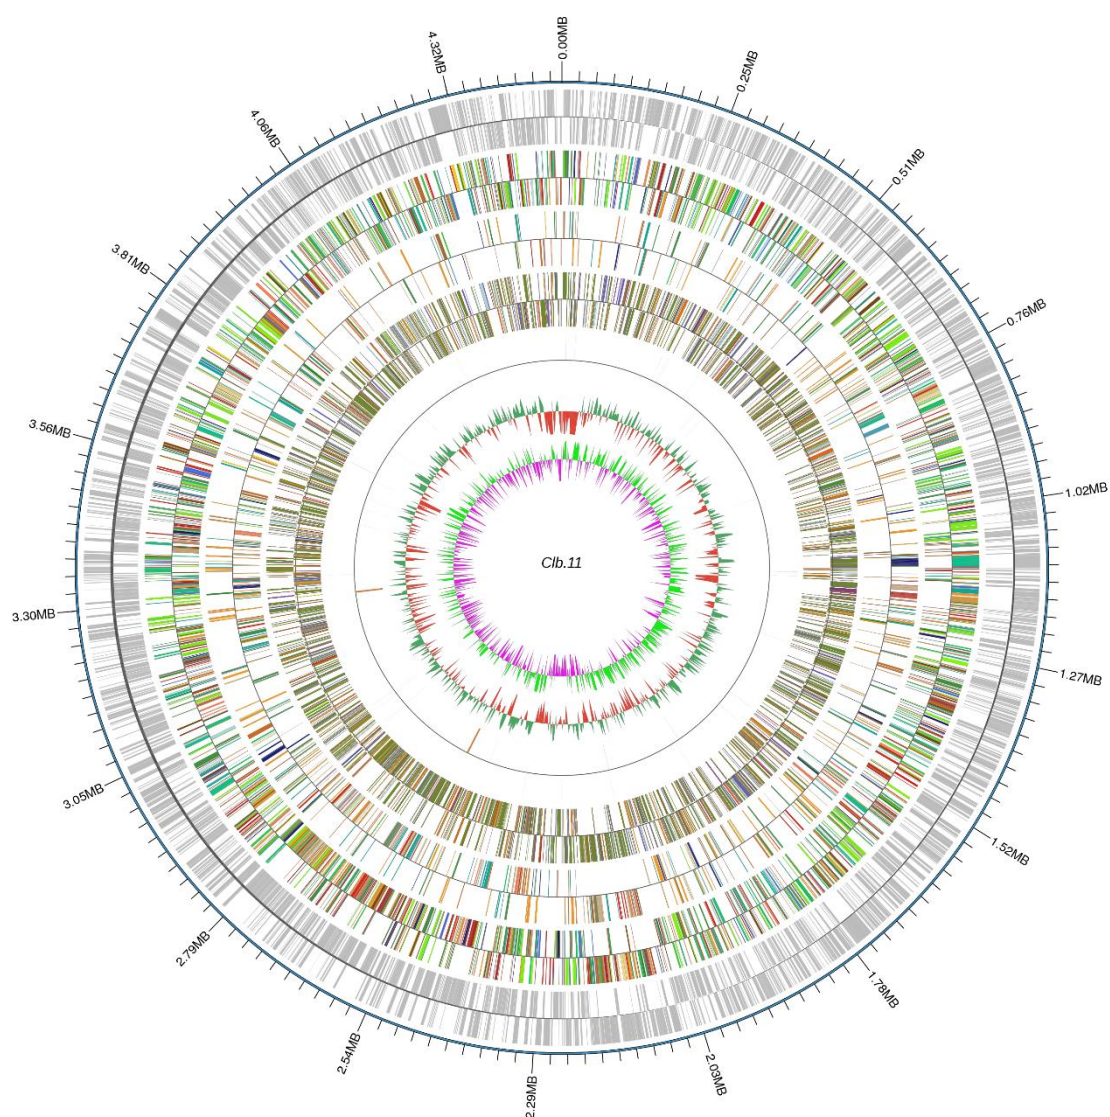

**Fig. S6** The whole genome complete map of *C. fimi* strain Clb-11 with 0 gaps. The outermost circle shows the position coordinates of the genome sequence. From the outside to the inside, the circles show the contents of coding genes, gene function annotation results (include annotation results of COG (KOG), KEGG and GO databases), ncRNA and genome GC content.

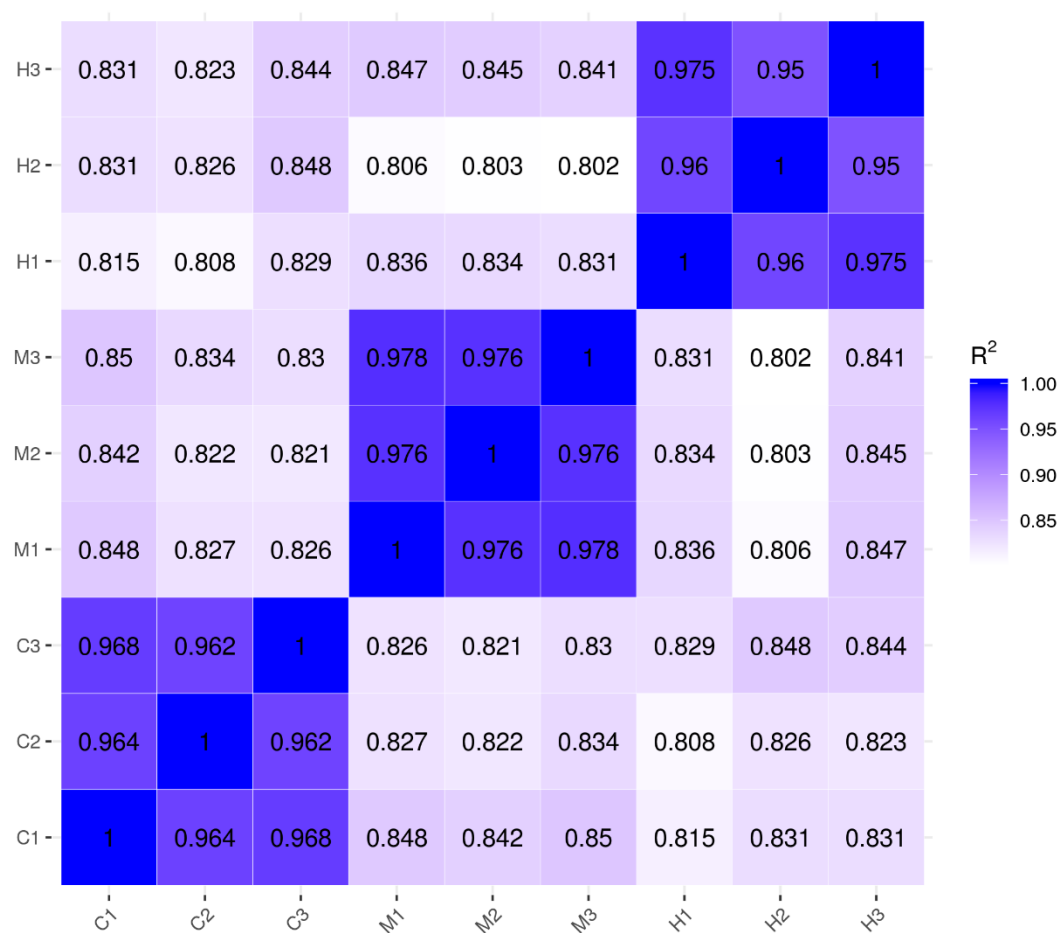

**Fig. S7** Pearson correlation among *C. fimi* strain Clb-11 cell samples, *C. fimi* strain Clb-11 with 0 mM Cr(VI) (C1, C2 and C3, as three replications), 0.2 mM Cr(VI) (M1, M2 and M3, as three replications) and 0.5 mM Cr(VI) (H1, H2 and H3, as three replications).



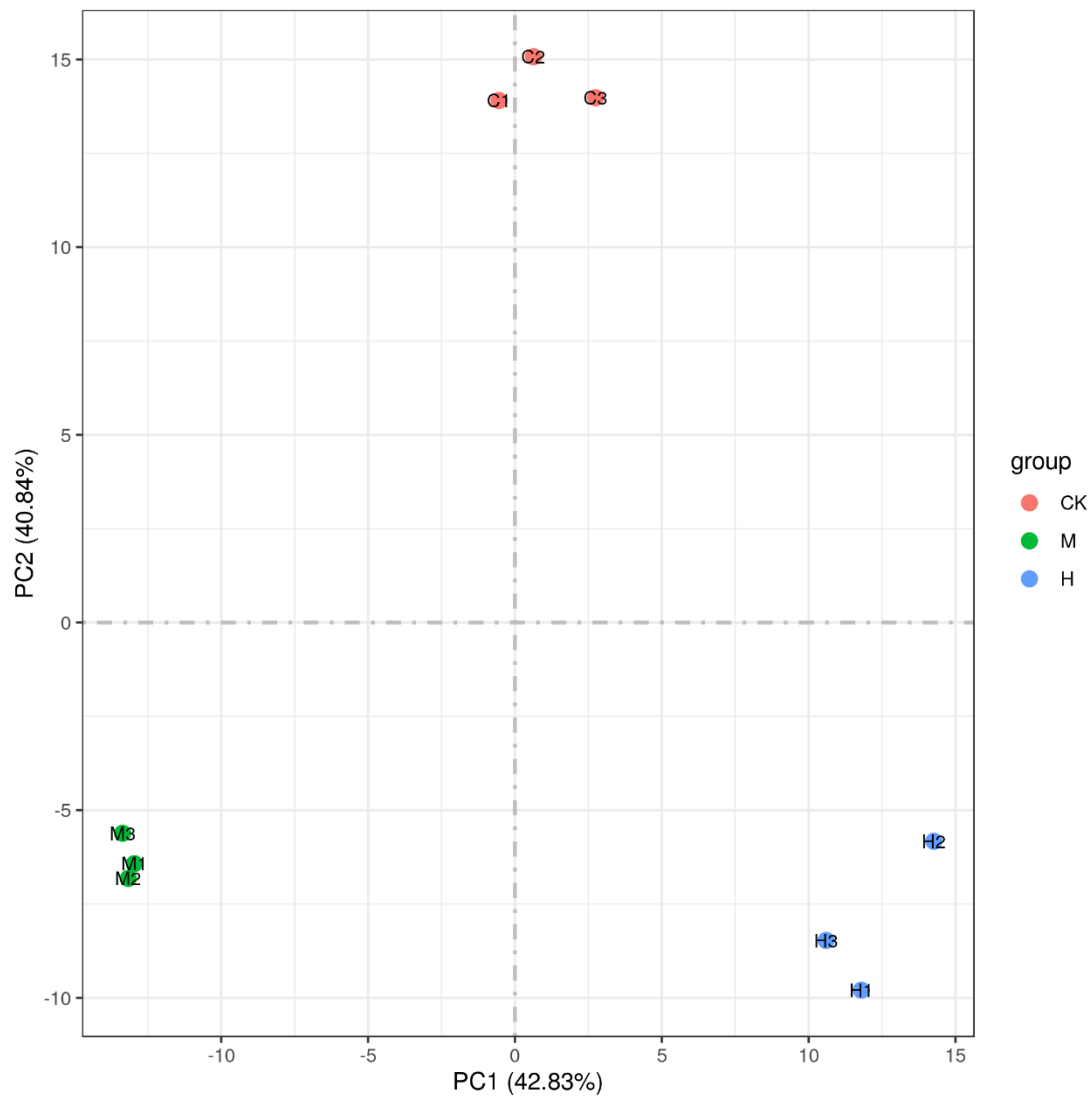

**Fig. S8** Principal component analysis (PCA) of *C. fimi* strain Clb-11 cell samples, *C. fimi* strain Clb-11 with 0 mM Cr(VI) (C1, C2 and C3, as three replications), 0.2 mM Cr(VI) (M1, M2 and M3, as three replications) and 0.5 mM Cr(VI) (H1, H2 and H3, as three replications).

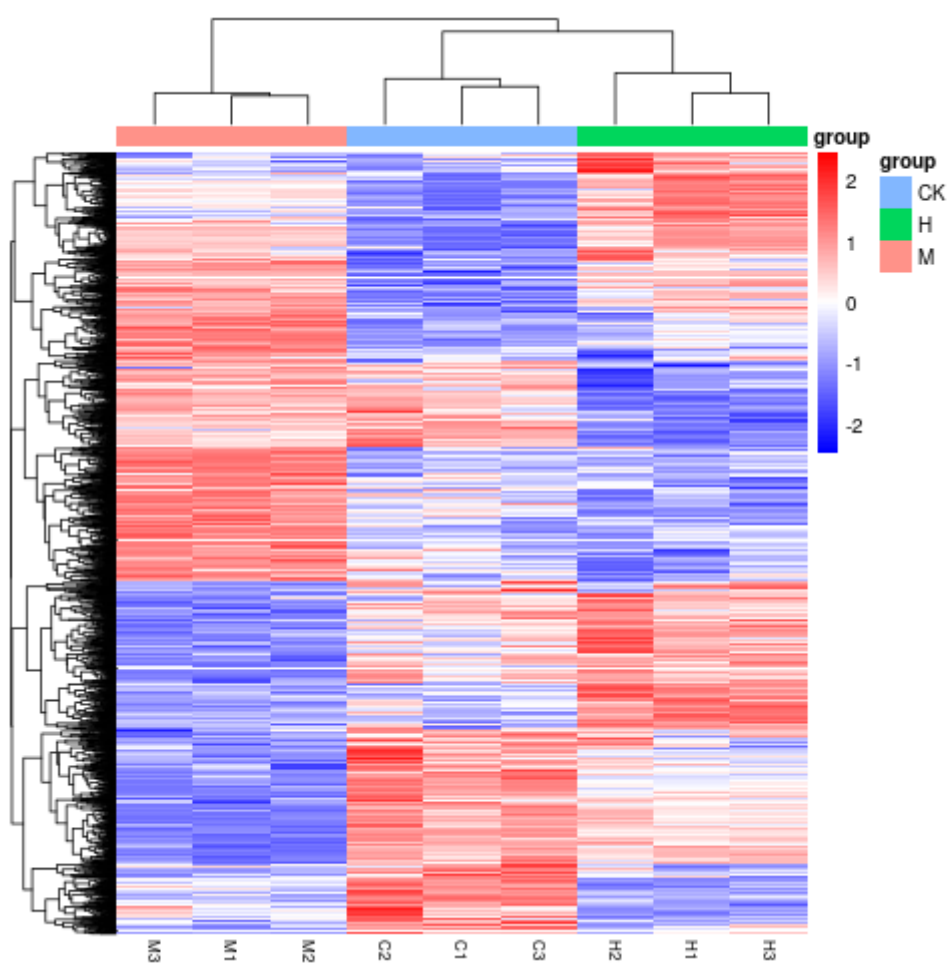

**Fig. S9** The differential gene cluster heatmap of *C. fimi* strain Clb-11 cells with 0 mM Cr(VI) (C1, C2 and C3, as three replications), 0.2 mM Cr(VI) (M1, M2 and M3, as three replications), and 0.5 mM Cr(VI) (H1, H2 and H3, as three replications).

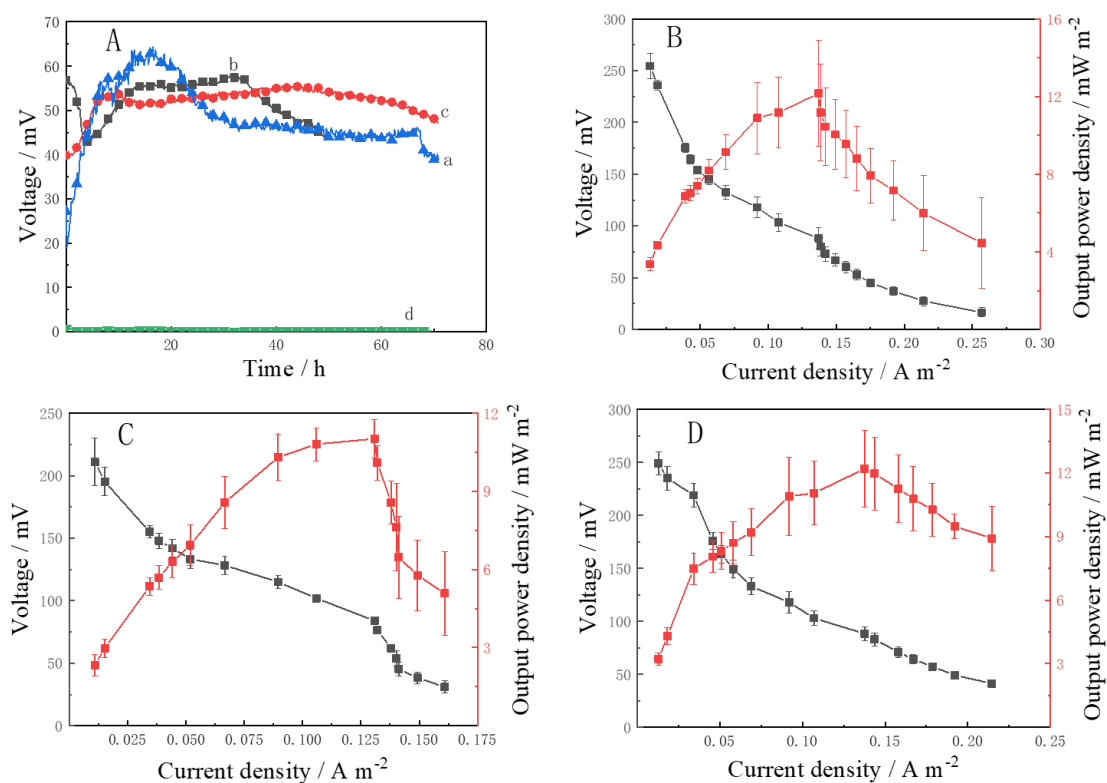

Fig. S10 Electricity production performance of strain Clb-11 in MFCs with different carbon sources. (A) Output voltage of the MFCs with CMC (curve a), glucose (curve b), and acetate (curve c) as the carbon sources and without carbon sources (curve d). (B), (C), and (D) Output power density and output voltage as a function of current density in the MFCs for Clb-11 with CMC, glucose, and acetate as the carbon sources, respectively.

Table S1 Sequencing analysis of *C. fimi* strain Clb-11

| Strain                       | Number of Reads | Number of Bases (bp) | Mean Read Length(bp) | N <sub>50</sub> Read Length(bp) | Mean Read quality |
|------------------------------|-----------------|----------------------|----------------------|---------------------------------|-------------------|
| <i>C. fimi</i> strain Clb-11 | 106,980.0       | 1,212,413,621.0      | 11,333.1             | 12,302.0                        | 10.9              |

**Note:** The Nanopore sequencing data were converted from fast5 format to fastq format using Guppy software basecalling, and the samples were split according to barcode using qcat software. The data split into each sample were quality controlled using NanoPlot software with a threshold of Q>7 to obtain valid data.

Table S2 Genome assembly results of *C. fimi* strain Clb-11

| Strain                       | Type       | genome size (bp) | GC%   |
|------------------------------|------------|------------------|-------|
| <i>C. fimi</i> strain Clb-11 | Chromosome | 4,486,195        | 74.41 |

Table S3 Coding gene prediction results of *C. fimi* strain Clb-11

| Strain                       | Gene number | Gene total length (bp) | Gene average length | Gene length/Genome(%) |
|------------------------------|-------------|------------------------|---------------------|-----------------------|
| <i>C. fimi</i> strain Clb-11 | 4052        | 4,088,556              | 1009                | 91.14                 |

Table S4 Prediction of secreted protein results

| Strain                       | SignalP protein | TMHMM protein | Secreted protein |
|------------------------------|-----------------|---------------|------------------|
| <i>C. fimi</i> strain Clb-11 | 195             | 1051          | 102              |

Table S5 Cr(VI) reduction ratio of *C. fimi* strain Clb-11 in different time periods

| Cr(VI) concentration<br>(mM) | Reduction ratio of Cr(VI) (mM·h <sup>-1</sup> ) |              |              |              |               |                   |                   |                   |
|------------------------------|-------------------------------------------------|--------------|--------------|--------------|---------------|-------------------|-------------------|-------------------|
|                              | 0 h to 24 h                                     | 24 h to 48 h | 48 h to 72 h | 72 h to 96 h | 96 h to 120 h | 120 h to 144<br>h | 144 h to 168<br>h | 168 h to 192<br>h |
| 0.1                          | 0.00060                                         | 0.00087      | 0.0013       | 0.0013       | 0.00023       | --                | --                | --                |
| 0.2                          | 0.0013                                          | 0.0020       | 0.0020       | 0.0026       | 0.00033       | --                | --                | --                |
| 0.3                          | 0.0035                                          | 0.0013       | 0.0013       | 0.0061       | 0.00025       | --                | --                | --                |
| 0.4                          | 0.0018                                          | 0.0028       | 0.0035       | 0.0084       | 0.00018       | --                | --                | --                |
| 0.5                          | 0.0039                                          | 0.0025       | 0.0025       | 0.011        | 0             | 0.00082           | --                | --                |
| 0.6                          | 0.0036                                          | 0.0033       | 0.0033       | 0.010        | 0.00082       | 0.00071           | 0                 | 0.00060           |
| 0.7                          | 0.0040                                          | 0.0046       | 0.0031       | 0.011        | 0             | 0.00057           | 0.00053           | 0                 |



Table S6 Annotation of 99 upregulated genes in *C. fimi* strain Clb-11 by KEGG orthology (KO)

| ORF                                                                                           | Gene name   | KO     | Gene product                                                                             |
|-----------------------------------------------------------------------------------------------|-------------|--------|------------------------------------------------------------------------------------------|
| <b>Two-component system and Valine, leucine and isoleucine degradation</b>                    |             |        |                                                                                          |
| Clb.11_GM000714                                                                               | <i>atoB</i> | K00626 | acetyl-CoA C-acetyltransferase                                                           |
| <b>ABC transporters</b>                                                                       |             |        |                                                                                          |
| Clb.11_GM001640                                                                               | <i>ganP</i> | K15771 | arabinogalactan oligomer/maltooligosaccharide transport system permease protein          |
| Clb.11_GM001639                                                                               | <i>ganO</i> | K15770 | arabinogalactan oligomer/maltooligosaccharide transport system substrate-binding protein |
| <b>2-Oxocarboxylic acid metabolism, Arginine biosynthesis and Biosynthesis of amino acids</b> |             |        |                                                                                          |
| Clb.11_GM002939                                                                               |             |        | GNAT family N-acetyltransferase                                                          |
| <b>Base excision repair</b>                                                                   |             |        |                                                                                          |
| Clb.11_GM002457                                                                               | <i>nei</i>  | K05522 | endonuclease VIII                                                                        |
| Clb.11_GM002494                                                                               | <i>mutM</i> | K10563 | formamidopyrimidine-DNA glycosylase                                                      |
| Clb.11_GM000352/Clb.11_GM001218                                                               | <i>xthA</i> | K01142 | exodeoxyribonuclease III                                                                 |
| Clb.11_GM002940                                                                               | <i>ligA</i> | K01972 | NAD-dependent DNA ligase LigA                                                            |
| Clb.11_GM002149                                                                               | <i>polA</i> | K02335 | DNA polymerase I                                                                         |
| <b>Mismatch repair</b>                                                                        |             |        |                                                                                          |
| Clb.11_GM002940                                                                               | <i>ligA</i> | K01972 | NAD-dependent DNA ligase LigA                                                            |
| Clb.11_GM001579                                                                               | <i>holA</i> | K02340 | DNA polymerase III subunit delta                                                         |
| <b>Homologous recombination</b>                                                               |             |        |                                                                                          |
| Clb.11_GM001926                                                                               | <i>ruvB</i> | K03551 | holliday junction DNA helicase RuvB                                                      |
| Clb.11_GM001579                                                                               | <i>holA</i> | K02340 | DNA polymerase III subunit delta                                                         |
| Clb.11_GM002149                                                                               | <i>polA</i> | K02335 | DNA polymerase I                                                                         |
| Clb.11_GM001925                                                                               | <i>ruvA</i> | K03550 | holliday junction DNA helicase RuvA                                                      |

|                                                                                                                |             |            |                                                     |
|----------------------------------------------------------------------------------------------------------------|-------------|------------|-----------------------------------------------------|
| Clb.11_GM002452                                                                                                | <i>recA</i> | K0355<br>3 | recombinase RecA                                    |
| <b>DNA replication</b>                                                                                         |             |            |                                                     |
| Clb.11_GM002940                                                                                                | <i>ligA</i> | K0197<br>2 | NAD-dependent DNA ligase<br>LigA                    |
| Clb.11_GM001579                                                                                                | <i>holA</i> | K0234<br>0 | DNA polymerase III subunit<br>delta                 |
| Clb.11_GM002149                                                                                                | <i>polA</i> | K0233<br>5 | DNA polymerase I                                    |
| Clb.11_GM004012                                                                                                | <i>dnaB</i> | K0231<br>4 | replicative DNA helicase                            |
| <b>Glyoxylate and dicarboxylate metabolism and Pyruvate metabolism</b>                                         |             |            |                                                     |
| Clb.11_GM000714                                                                                                | <i>atoB</i> | K0062<br>6 | acetyl-CoA C-<br>acetyltransferase                  |
| <b>Nucleotide metabolism</b>                                                                                   |             |            |                                                     |
| Clb.11_GM000387                                                                                                | <i>nrdA</i> | K0052<br>5 | ribonucleoside-diphosphate<br>reductase alpha chain |
| <b>Fatty acid metabolism, Terpenoid backbone biosynthesis and Microbial metabolism in diverse environments</b> |             |            |                                                     |
| Clb.11_GM000714                                                                                                | <i>atoB</i> | K0062<br>6 | acetyl-CoA C-<br>acetyltransferase                  |
| <b>Nucleotide excision repair</b>                                                                              |             |            |                                                     |
| Clb.11_GM002128                                                                                                | <i>uvrC</i> | K0370<br>3 | excinuclease ABC subunit C                          |
| Clb.11_GM002940                                                                                                | <i>ligA</i> | K0197<br>2 | NAD-dependent DNA ligase<br>LigA                    |
| Clb.11_GM002131                                                                                                | <i>uvrA</i> | K0370<br>1 | excinuclease ABC subunit A                          |
| Clb.11_GM002149                                                                                                | <i>polA</i> | K0233<br>5 | DNA polymerase I                                    |
| <b>Carbon metabolism, Butanoate metabolism and Fatty acid degradation</b>                                      |             |            |                                                     |
| Clb.11_GM000714                                                                                                | <i>atoB</i> | K0062<br>6 | acetyl-CoA C-<br>acetyltransferase                  |
| <b>Pyrimidine metabolism</b>                                                                                   |             |            |                                                     |
| Clb.11_GM000387                                                                                                | <i>nrdA</i> | K0052<br>5 | ribonucleoside-diphosphate<br>reductase alpha chain |
| <b>Streptomycin biosynthesis</b>                                                                               |             |            |                                                     |
| Clb.11_GM004026                                                                                                | <i>INO1</i> | K0185<br>8 | myo-inositol-1-phosphate<br>synthase                |
| <b>Purine metabolism</b>                                                                                       |             |            |                                                     |
| Clb.11_GM000387                                                                                                | <i>nrdA</i> | K0052<br>5 | ribonucleoside-diphosphate<br>reductase alpha chain |
| <b>Nicotinate and nicotinamide metabolism and Biosynthesis of cofactors</b>                                    |             |            |                                                     |
| Clb.11_GM000820                                                                                                | <i>pncB</i> | K0076      | nicotinate phosphoribosyl                           |

|                                              |                      |            |                                                                   |
|----------------------------------------------|----------------------|------------|-------------------------------------------------------------------|
|                                              |                      | 3          | transferase                                                       |
| <b>Sulfur relay system</b>                   |                      |            |                                                                   |
| Clb.11_GM003716                              |                      |            | ThiF family<br>adenylyltransferase                                |
| <b>Biosynthesis of secondary metabolites</b> |                      |            |                                                                   |
| Clb.11_GM000714                              | <i>atoB</i>          | K0062<br>6 | acetyl-CoA C-<br>acetyltransferase                                |
| Clb.11_GM002939                              |                      |            | GNAT family N-<br>acetyltransferase                               |
| Clb.11_GM004026                              | <i>INO1</i>          | K0185<br>8 | myo-inositol-1-phosphate<br>synthase                              |
| <b>Others</b>                                |                      |            |                                                                   |
| Clb.11_GM000211                              | <i>phnB</i>          | K0475<br>0 | VOC family protein                                                |
| Clb.11_GM002451                              | <i>recX</i>          | K0356<br>5 | regulatory protein RecX                                           |
| Clb.11_GM002278                              | <i>imuB</i>          | K1416<br>1 | Y-family DNA polymerase                                           |
| Clb.11_GM002813                              | <i>dinB</i>          | K0234<br>6 | DNA polymerase IV                                                 |
| Clb.11_GM000067                              | <i>dcm</i>           | K0055<br>8 | DNA (cytosine-5)-<br>methyltransferase 1                          |
| Clb.11_GM000379                              | <i>radA</i>          | K0448<br>5 | DNA repair protein<br>RadA/Sms                                    |
| Clb.11_GM002277                              | <i>dnaE2</i>         | K1416<br>2 | error-prone DNA polymerase                                        |
| Clb.11_GM002431                              | <i>lexA</i>          | K0135<br>6 | transcriptional repressor LexA                                    |
| Clb.11_GM003261                              | <i>lmrB</i>          | K1892<br>6 | MFS transporter, DHA2<br>family, lincomycin resistance<br>protein |
| Clb.11_GM001221                              | <i>ABC.CD.<br/>P</i> | K0200<br>4 | putative ABC transport<br>system permease protein                 |
| Clb.11_GM001447                              | <i>TC.DME</i>        | K0329<br>8 | drug/metabolite transporter,<br>DME family                        |
| Clb.11_GM001222                              | <i>ABC.CD.<br/>A</i> | K0200<br>3 | putative ABC transport<br>system ATP-binding protein              |
| Clb.11_GM000385                              | <i>nrdH</i>          | K0619<br>1 | glutaredoxin-like protein<br>NrdH                                 |
| Clb.11_GM003910                              | <i>mef</i>           | K0821<br>7 | MFS transporter, DHA3<br>family, macrolide efflux<br>protein      |
| Clb.11_GM000386                              | <i>nrdI</i>          | K0364<br>7 | protein involved in<br>ribonucleotide reduction                   |

|                 |                                 |            |                                                                                      |
|-----------------|---------------------------------|------------|--------------------------------------------------------------------------------------|
| Clb.11_GM003172 | <i>bglB</i>                     | K0535<br>0 | beta-glucosidase                                                                     |
| Clb.11_GM003174 | <i>padR</i>                     | K1094<br>7 | PadR family transcriptional<br>regulator, regulatory protein<br>PadR                 |
| Clb.11_GM001246 | <i>whiB7</i>                    | K1895<br>8 | WhiB family transcriptional<br>regulator, redox-sensing<br>transcriptional regulator |
| Clb.11_GM000184 | <i>sbcD</i> ,<br><i>Mre11</i>   | K0354<br>7 | DNA repair protein<br>SbcD/Mre11                                                     |
| Clb.11_GM000185 | <i>sbcC</i> ,<br><i>rad50</i>   | K0354<br>6 | DNA repair protein<br>SbcC/Rad50                                                     |
| Clb.11_GM001163 | <i>yaeJ</i>                     | K1503<br>4 | ribosome-associated protein                                                          |
| Clb.11_GM002456 | <i>lhr</i>                      | K0372<br>4 | ATP-dependent helicase Lhr<br>and Lhr-like helicase                                  |
| Clb.11_GM001380 | <i>ftsK</i> ,<br><i>spoIIIE</i> | K0346<br>6 | DNA segregation ATPase<br>FtsK/SpoIIIE, S-DNA-T<br>family                            |
| Clb.11_GM000107 | <i>htpG</i>                     | K0407<br>9 | molecular chaperone HtpG                                                             |
| Clb.11_GM001182 | <i>pcrA</i>                     | K0365<br>7 | DNA helicase PcrA                                                                    |
| Clb.11_GM000785 | <i>troR</i>                     | K0370<br>9 | DtxR family transcriptional<br>regulator, Mn-dependent<br>transcriptional regulator  |
| Clb.11_GM001139 | <i>groES</i>                    | K0407<br>8 | chaperonin GroES                                                                     |
| Clb.11_GM002416 |                                 |            | SAV_6107 family HEPN<br>domain-containing protein                                    |
| Clb.11_GM002279 |                                 |            | hypothetical protein                                                                 |
| Clb.11_GM001938 |                                 |            | Rv2578c family radical SAM<br>protein                                                |
| Clb.11_GM001223 |                                 |            | efflux RND transporter<br>periplasmic adaptor subunit                                |
| Clb.11_GM000356 |                                 |            | MBL fold metallo-hydrolase                                                           |
| Clb.11_GM001165 |                                 |            | ABC transporter ATP-binding<br>protein                                               |
| Clb.11_GM003992 |                                 |            | hypothetical protein                                                                 |
| Clb.11_GM003947 |                                 |            | dienelactone hydrolase family<br>protein                                             |
| Clb.11_GM004025 |                                 |            | helix-turn-helix<br>transcriptional regulator                                        |
| Clb.11_GM004005 |                                 |            | hypothetical protein                                                                 |

|                 |                                                    |
|-----------------|----------------------------------------------------|
| Clb.11_GM001164 | ABC transporter ATP-binding protein                |
| Clb.11_GM001239 | ATP-dependent DNA helicase                         |
| Clb.11_GM004013 | MATE family efflux transporter                     |
| Clb.11_GM003325 | LLM class flavin-dependent oxidoreductase          |
| Clb.11_GM000897 | HAD-IB family hydrolase                            |
| Clb.11_GM002783 | hypothetical protein                               |
| Clb.11_GM003262 | hypothetical protein                               |
| Clb.11_GM000515 | hypothetical protein                               |
| Clb.11_GM001903 | DUF4132 domain-containing protein                  |
| Clb.11_GM003213 | DUF6518 family protein                             |
| Clb.11_GM000312 | HNH endonuclease family protein                    |
| Clb.11_GM002656 | DEAD/DEAH box helicase                             |
| Clb.11_GM004004 | hypothetical protein                               |
| Clb.11_GM003732 | GNAT family N-acetyltransferase                    |
| Clb.11_GM000967 | class I SAM-dependent methyltransferase            |
| Clb.11_GM003918 | winged helix DNA-binding domain-containing protein |
| Clb.11_GM000856 | Uncharacterized protein                            |
| Clb.11_GM000992 | YceI family protein                                |
| Clb.11_GM000378 | hypothetical protein                               |
| Clb.11_GM004003 | hypothetical protein                               |
| Clb.11_GM002628 | hypothetical protein                               |
| Clb.11_GM002722 | patatin-like phospholipase family protein          |
| Clb.11_GM000715 | TetR/AcrR family transcriptional regulator         |
| Clb.11_GM000315 | hemolysin family protein                           |
| Clb.11_GM000056 | hypothetical protein                               |
|                 | rhomboid family                                    |
| Clb.11_GM000025 | intramembrane serine protease                      |
| Clb.11_GM001593 | DUF4870 domain-containing protein                  |
| Clb.11_GM000316 | hemolysin family protein                           |
| Clb.11_GM000829 | HNH endonuclease                                   |
| Clb.11_GM000310 | rhomboid family                                    |
|                 | intramembrane serine                               |

|                 |                                                  |
|-----------------|--------------------------------------------------|
| Clb.11_GM000350 | protease<br>DUF4190 domain-containing<br>protein |
| Clb.11_GM000827 | hypothetical protein                             |
| Clb.11_GM002723 | restriction endonuclease                         |
| Clb.11_GM003847 | hypothetical protein                             |
| Clb.11_GM001188 | OmpA family protein                              |
| Clb.11_GM004002 | hypothetical protein                             |
| Clb.11_GM003911 | GyrI-like domain-containing<br>protein           |
| Clb.11_GM001904 | AAA family ATPase                                |
| Clb.11_GM003968 | hypothetical protein                             |

---

Table S7 Annotation of 78 downregulated genes in *C. fimi* strain Clb-11 by KEGG orthology (KO)

| ORF                                                | Gene name   | KO     | Gene product                                                                |
|----------------------------------------------------|-------------|--------|-----------------------------------------------------------------------------|
| <b>Two-component system</b>                        |             |        |                                                                             |
| Clb.11_GM002037                                    | <i>cbhA</i> | K19668 | cellulose 1,4-beta-cellobiosidase                                           |
| Clb.11_GM001485                                    | <i>cydA</i> | K00425 | cytochrome bd ubiquinol oxidase subunit I                                   |
| <b>Propanoate metabolism</b>                       |             |        |                                                                             |
| Clb.11_GM001153                                    | <i>ackA</i> | K00925 | acetate kinase                                                              |
| Clb.11_GM001154                                    | <i>pta</i>  | K13788 | phosphate acetyltransferase                                                 |
| <b>ABC transporters</b>                            |             |        |                                                                             |
| Clb.11_GM001482                                    | <i>cydC</i> | K16012 | ATP-binding cassette, subfamily C, bacterial<br>CydC                        |
| Clb.11_GM001483                                    | <i>cydD</i> | K16013 | ATP-binding cassette, subfamily C, bacterial<br>CydD                        |
| Clb.11_GM002904                                    | <i>msmE</i> | K10117 | raffinose/stachyose/melibiose transport system<br>substrate-binding protein |
| Clb.11_GM002903                                    | <i>msmF</i> | K10118 | raffinose/stachyose/melibiose transport system<br>permease protein          |
| <b>Oxidative phosphorylation</b>                   |             |        |                                                                             |
| Clb.11_GM001485                                    | <i>cydA</i> | K00425 | cytochrome bd ubiquinol oxidase subunit I                                   |
| Clb.11_GM001484                                    | <i>cydB</i> | K00426 | cytochrome bd ubiquinol oxidase subunit II                                  |
| <b>Pyruvate metabolism</b>                         |             |        |                                                                             |
| Clb.11_GM001153                                    | <i>ackA</i> | K00925 | acetate kinase                                                              |
| Clb.11_GM002197                                    | <i>pyk</i>  | K00873 | pyruvate kinase                                                             |
| Clb.11_GM001681                                    | <i>aceE</i> | K00163 | pyruvate dehydrogenase E1 component                                         |
| Clb.11_GM001154                                    | <i>pta</i>  | K13788 | phosphate acetyltransferase                                                 |
| <b>Starch and sucrose metabolism</b>               |             |        |                                                                             |
| Clb.11_GM002670                                    | <i>pgi</i>  | K01810 | glucose-6-phosphate isomerase                                               |
| Clb.11_GM002037                                    | <i>cbhA</i> | K19668 | cellulose 1,4-beta-cellobiosidase                                           |
| Clb.11_GM003247                                    | <i>galU</i> | K00963 | UTP--glucose-1-phosphate uridylyl transferase                               |
| <b>Alanine, aspartate and glutamate metabolism</b> |             |        |                                                                             |
| Clb.11_GM002736                                    | <i>gltD</i> | K00266 | glutamate synthase (NADPH) small chain                                      |
| <b>Glyoxylate and dicarboxylate metabolism</b>     |             |        |                                                                             |
| Clb.11_GM001215                                    | <i>glyA</i> | K00600 | glycine hydroxymethyl transferase                                           |
| Clb.11_GM002540                                    | <i>gph</i>  | K01091 | phosphoglycolate phosphatase                                                |
| <b>Nitrogen metabolism</b>                         |             |        |                                                                             |
| Clb.11_GM000112                                    | <i>nirB</i> | K00362 | nitrite reductase (NADH) large subunit                                      |
| Clb.11_GM002673                                    | <i>nirK</i> | K00368 | nitrite reductase (NO-forming)                                              |
| Clb.11_GM002736                                    | <i>gltD</i> | K00266 | glutamate synthase (NADPH) small chain                                      |
| <b>Carbon metabolism</b>                           |             |        |                                                                             |
| Clb.11_GM002670                                    | <i>pgi</i>  | K01810 | glucose-6-phosphate isomerase                                               |
| Clb.11_GM001215                                    | <i>glyA</i> | K00600 | glycine hydroxymethyl transferase                                           |
| Clb.11_GM001153                                    | <i>ackA</i> | K00925 | acetate kinase                                                              |
| Clb.11_GM003460                                    | <i>gpmA</i> | K01834 | 2,3-bisphosphoglycerate-dependent<br>phosphoglycerate mutase                |

|                                                    |             |        |                                                                                               |
|----------------------------------------------------|-------------|--------|-----------------------------------------------------------------------------------------------|
| Clb.11_GM002197                                    | <i>pyk</i>  | K00873 | pyruvate kinase                                                                               |
| Clb.11_GM001216                                    | <i>fold</i> | K01491 | methylenetetrahydrofolate dehydrogenase<br>(NADP+)/methenyltetrahydrofolate<br>cyclohydrolase |
| Clb.11_GM001681                                    | <i>aceE</i> | K00163 | pyruvate dehydrogenase E1 component                                                           |
| Clb.11_GM001154                                    | <i>pta</i>  | K13788 | phosphate acetyltransferase                                                                   |
| <b>Glycine, serine and threonine metabolism</b>    |             |        |                                                                                               |
| Clb.11_GM001215                                    | <i>glyA</i> | K00600 | glycine hydroxymethyl transferase                                                             |
| Clb.11_GM003460                                    | <i>gpmA</i> | K01834 | 2,3-bisphosphoglycerate-dependent<br>phosphoglycerate mutase                                  |
| <b>Glycolysis/Gluconeogenesis</b>                  |             |        |                                                                                               |
| Clb.11_GM002670                                    | <i>pgi</i>  | K01810 | glucose-6-phosphate isomerase                                                                 |
| Clb.11_GM003460                                    | <i>gpmA</i> | K01834 | 2,3-bisphosphoglycerate-dependent<br>phosphoglycerate mutase                                  |
| Clb.11_GM002197                                    | <i>pyk</i>  | K00873 | pyruvate kinase                                                                               |
| Clb.11_GM001681                                    | <i>aceE</i> | K00163 | pyruvate dehydrogenase E1 component                                                           |
| <b>Citrate cycle (TCA cycle)</b>                   |             |        |                                                                                               |
| Clb.11_GM001681                                    | <i>aceE</i> | K00163 | pyruvate dehydrogenase E1 component                                                           |
| <b>Purine metabolism</b>                           |             |        |                                                                                               |
| Clb.11_GM001195                                    | <i>purH</i> | K00602 | phosphoribosylaminoimidazolecarboxamide<br>formyltransferase/IMP cyclohydrolase               |
| <b>One carbon pool by folate</b>                   |             |        |                                                                                               |
| Clb.11_GM001215                                    | <i>glyA</i> | K00600 | glycine hydroxymethyl transferase                                                             |
| Clb.11_GM001216                                    | <i>fold</i> | K01491 | methylenetetrahydrofolate dehydrogenase<br>(NADP+)/methenyltetrahydrofolate<br>cyclohydrolase |
| Clb.11_GM001195                                    | <i>purH</i> | K00602 | phosphoribosylaminoimidazolecarboxamide<br>formyltransferase/IMP cyclohydrolase               |
| <b>Methane metabolism</b>                          |             |        |                                                                                               |
| Clb.11_GM001215                                    | <i>glyA</i> | K00600 | glycine hydroxymethyl transferase                                                             |
| Clb.11_GM001153                                    | <i>ackA</i> | K00925 | acetate kinase                                                                                |
| Clb.11_GM003460                                    | <i>gpmA</i> | K01834 | 2,3-bisphosphoglycerate-dependent<br>phosphoglycerate mutase                                  |
| Clb.11_GM001154                                    | <i>pta</i>  | K13788 | phosphate acetyltransferase                                                                   |
| <b>Pentose and glucuronate interconversions</b>    |             |        |                                                                                               |
| Clb.11_GM000269                                    | <i>ugd</i>  | K00012 | UDPglucose 6-dehydrogenase                                                                    |
| Clb.11_GM003247                                    | <i>galU</i> | K00963 | UTP--glucose-1-phosphate uridylyl transferase                                                 |
| <b>Galactose metabolism</b>                        |             |        |                                                                                               |
| Clb.11_GM003247                                    | <i>galU</i> | K00963 | UTP--glucose-1-phosphate uridylyl transferase                                                 |
| <b>Pentose phosphate pathway</b>                   |             |        |                                                                                               |
| Clb.11_GM002670                                    | <i>pgi</i>  | K01810 | glucose-6-phosphate isomerase                                                                 |
| Clb.11_GM001155                                    | <i>xfp</i>  | K01621 | xylulose-5-phosphate/fructose-6-phosphate<br>phosphoketolase                                  |
| <b>Amino sugar and nucleotide sugar metabolism</b> |             |        |                                                                                               |



|                                                     |             |        |                                                                                               |
|-----------------------------------------------------|-------------|--------|-----------------------------------------------------------------------------------------------|
| Clb.11_GM002670                                     | <i>pgi</i>  | K01810 | glucose-6-phosphate isomerase                                                                 |
| Clb.11_GM003311                                     | E3.2.1.14   | K01183 | chitinase                                                                                     |
| Clb.11_GM000269                                     | <i>ugd</i>  | K00012 | UDPglucose 6-dehydrogenase                                                                    |
| Clb.11_GM003139                                     |             |        | AraC family transcriptional regulator                                                         |
| Clb.11_GM003247                                     | <i>galU</i> | K00963 | UTP--glucose-1-phosphate uridylyl transferase                                                 |
| <b>O-Antigen nucleotide sugar biosynthesis</b>      |             |        |                                                                                               |
| Clb.11_GM000269                                     | <i>ugd</i>  | K00012 | UDPglucose 6-dehydrogenase                                                                    |
| Clb.11_GM003247                                     | <i>galU</i> | K00963 | UTP--glucose-1-phosphate uridylyl transferase                                                 |
| <b>Biosynthesis of nucleotide sugars</b>            |             |        |                                                                                               |
| Clb.11_GM002670                                     | <i>pgi</i>  | K01810 | glucose-6-phosphate isomerase                                                                 |
| Clb.11_GM000269                                     | <i>ugd</i>  | K00012 | UDPglucose 6-dehydrogenase                                                                    |
| Clb.11_GM003247                                     | <i>galU</i> | K00963 | UTP--glucose-1-phosphate uridylyl transferase                                                 |
| <b>Biosynthesis of amino acids</b>                  |             |        |                                                                                               |
| Clb.11_GM001215                                     | <i>glyA</i> | K00600 | glycine hydroxymethyl transferase                                                             |
| Clb.11_GM003460                                     | <i>gpmA</i> | K01834 | 2,3-bisphosphoglycerate-dependent<br>phosphoglycerate mutase                                  |
| Clb.11_GM002197                                     | <i>pyk</i>  | K00873 | pyruvate kinase                                                                               |
| Clb.11_GM002736                                     | <i>gltD</i> | K00266 | glutamate synthase (NADPH) small chain                                                        |
| <b>Porphyrin metabolism</b>                         |             |        |                                                                                               |
| Clb.11_GM001259                                     |             |        | TIGR04053 family radical SAM/SPASM<br>domain-containing protein                               |
| <b>Microbial metabolism in diverse environments</b> |             |        |                                                                                               |
| Clb.11_GM002670                                     | <i>pgi</i>  | K01810 | glucose-6-phosphate isomerase                                                                 |
| Clb.11_GM001215                                     | <i>glyA</i> | K00600 | glycine hydroxymethyl transferase                                                             |
| Clb.11_GM000112                                     | <i>nirB</i> | K00362 | nitrite reductase (NADH) large subunit                                                        |
| Clb.11_GM001153                                     | <i>ackA</i> | K00925 | acetate kinase                                                                                |
| Clb.11_GM003460                                     | <i>gpmA</i> | K01834 | 2,3-bisphosphoglycerate-dependent<br>phosphoglycerate mutase                                  |
| Clb.11_GM002197                                     | <i>pyk</i>  | K00873 | pyruvate kinase                                                                               |
| Clb.11_GM001216                                     | <i>fold</i> | K01491 | methylenetetrahydrofolate dehydrogenase<br>(NADP+)/methenyltetrahydrofolate<br>cyclohydrolase |
| Clb.11_GM001681                                     | <i>aceE</i> | K00163 | pyruvate dehydrogenase E1 component                                                           |
| Clb.11_GM002673                                     | <i>nirK</i> | K00368 | nitrite reductase (NO-forming)                                                                |
| Clb.11_GM001154                                     | <i>pta</i>  | K13788 | phosphate acetyltransferase                                                                   |
| Clb.11_GM001155                                     | <i>xfp</i>  | K01621 | xylulose-5-phosphate/fructose-6-phosphate<br>phosphoketolase                                  |
| Clb.11_GM002736                                     | <i>gltD</i> | K00266 | glutamate synthase (NADPH) small chain                                                        |
| <b>Biosynthesis of cofactors</b>                    |             |        |                                                                                               |
| Clb.11_GM001215                                     | <i>glyA</i> | K00600 | glycine hydroxymethyl transferase                                                             |
| Clb.11_GM001216                                     | <i>fold</i> | K01491 | methylenetetrahydrofolate dehydrogenase<br>(NADP+)/methenyltetrahydrofolate<br>cyclohydrolase |
| Clb.11_GM001259                                     |             |        | TIGR04053 family radical SAM/SPASM                                                            |

|                                              |                |        |                                                                                   |
|----------------------------------------------|----------------|--------|-----------------------------------------------------------------------------------|
|                                              |                |        | domain-containing protein                                                         |
| Clb.11_GM000269                              | <i>ugd</i>     | K00012 | UDPglucose 6-dehydrogenase                                                        |
| Clb.11_GM003247                              | <i>galU</i>    | K00963 | UTP--glucose-1-phosphate uridylyl transferase                                     |
| <b>Biosynthesis of secondary metabolites</b> |                |        |                                                                                   |
| Clb.11_GM002670                              | <i>pgi</i>     | K01810 | glucose-6-phosphate isomerase                                                     |
| Clb.11_GM001215                              | <i>glyA</i>    | K00600 | glycine hydroxymethyl transferase                                                 |
| Clb.11_GM002540                              | <i>gph</i>     | K01091 | phosphoglycolate phosphatase                                                      |
| Clb.11_GM000360                              | <i>glpD</i>    | K00111 | glycerol-3-phosphate dehydrogenase                                                |
| Clb.11_GM003460                              | <i>gpmA</i>    | K01834 | 2,3-bisphosphoglycerate-dependent<br>phosphoglycerate mutase                      |
| Clb.11_GM002197                              | <i>pyk</i>     | K00873 | pyruvate kinase                                                                   |
| Clb.11_GM001681                              | <i>aceE</i>    | K00163 | pyruvate dehydrogenase E1 component                                               |
| Clb.11_GM001259                              |                |        | TIGR04053 family radical SAM/SPASM<br>domain-containing protein                   |
| Clb.11_GM001195                              | <i>purH</i>    | K00602 | Phosphoribosylaminoimidazole carboxamide<br>formyl transferase/IMP cyclohydrolase |
| Clb.11_GM002736                              | <i>gltD</i>    | K00266 | glutamate synthase (NADPH) small chain                                            |
| Clb.11_GM003247                              | <i>galU</i>    | K00963 | UTP--glucose-1-phosphate uridylyl transferase                                     |
| <b>Others</b>                                |                |        |                                                                                   |
| Clb.11_GM001207                              | <i>sprC</i>    | K18546 | Streptogrisin C                                                                   |
| Clb.11_GM000079                              | <i>feoB</i>    | K04759 | ferrous iron transport protein B                                                  |
| Clb.11_GM000080                              | <i>feoA</i>    | K04758 | ferrous iron transport protein A                                                  |
| Clb.11_GM003226                              | <i>rpfB</i>    | K21688 | resuscitation-promoting factor RpfB                                               |
| Clb.11_GM000267                              | <i>hasA</i>    | K00752 | hyaluronan synthase                                                               |
| Clb.11_GM001545                              | <i>sacB</i>    | K00692 | levansucrase                                                                      |
| Clb.11_GM000893                              | <i>nirC</i>    | K02598 | nitrite transporter                                                               |
| Clb.11_GM000359                              | <i>GLPF</i>    | K02440 | glycerol uptake facilitator protein                                               |
| Clb.11_GM002584                              | <i>TC.GNTP</i> | K03299 | gluconate:H <sup>+</sup> symporter, GntP family                                   |
| Clb.11_GM003931                              |                |        | M28 family metallopeptidase                                                       |
| Clb.11_GM001581                              |                |        | EAL domain-containing protein                                                     |
| Clb.11_GM001583                              |                |        | transcriptional regulator                                                         |
| Clb.11_GM000942                              |                |        | hypothetical protein                                                              |
| Clb.11_GM002642                              |                |        | hypothetical protein                                                              |
| Clb.11_GM003764                              |                |        | alpha/beta hydrolase                                                              |
| Clb.11_GM003436                              |                |        | alanine racemase                                                                  |
| Clb.11_GM003437                              |                |        | MFS transporter                                                                   |
| Clb.11_GM003438                              |                |        | TetR family transcriptional regulator                                             |
| Clb.11_GM002289                              |                |        | SDR family oxidoreductase                                                         |
| Clb.11_GM000324                              |                |        | aminoglycoside phosphotransferase                                                 |
| Clb.11_GM001582                              |                |        | hypothetical protein                                                              |
| Clb.11_GM002674                              |                |        | hypothetical protein                                                              |
| Clb.11_GM002195                              |                |        | hypothetical protein                                                              |
| Clb.11_GM001487                              |                |        | YihY/virulence factor BrkB family protein                                         |
| Clb.11_GM000808                              |                |        | hypothetical protein                                                              |

|                 |                                                                  |
|-----------------|------------------------------------------------------------------|
| Clb.11_GM000334 | YhgE/Pip domain-containing protein                               |
| Clb.11_GM000333 | hypothetical protein                                             |
| Clb.11_GM001865 | hypothetical protein                                             |
| Clb.11_GM000268 | glycosyl hydrolase                                               |
| Clb.11_GM000766 | peptidase                                                        |
| Clb.11_GM003327 | phage holin family protein                                       |
| Clb.11_GM002675 | helix-turn-helix domain-containing protein                       |
| Clb.11_GM001304 | hypothetical protein                                             |
| Clb.11_GM001866 | hypothetical protein                                             |
| Clb.11_GM000017 | hypothetical protein                                             |
| Clb.11_GM000308 | GPP34 family phosphoprotein                                      |
| Clb.11_GM000813 | hypothetical protein                                             |
| Clb.11_GM000259 | APC family permease                                              |
| Clb.11_GM002268 | LacI family DNA-binding transcriptional<br>regulator             |
| Clb.11_GM003925 | antitoxin                                                        |
| Clb.11_GM002478 | hypothetical protein                                             |
| Clb.11_GM001885 | hypothetical protein                                             |
| Clb.11_GM002682 | GDSL-type esterase/lipase family protein                         |
| Clb.11_GM000470 | hypothetical protein                                             |
| Clb.11_GM003875 | PQQ-dependent sugar dehydrogenase                                |
| Clb.11_GM002545 | phosphoribosyltransferase                                        |
| Clb.11_GM003708 | hypothetical protein                                             |
| Clb.11_GM000264 | aminoglycoside phosphotransferase family<br>protein              |
| Clb.11_GM000016 | GNAT family protein                                              |
| Clb.11_GM001105 | hypothetical protein                                             |
| Clb.11_GM001680 | hypothetical protein                                             |
| Clb.11_GM001357 | MarR family winged helix-turn-helix<br>transcriptional regulator |

---

Table S8 Expression levels of known chromate reductase and transporter coding genes in Clb-11

|                      | ORF             | Gene name   | Fragments Per Kilobase of exon model per Million mapped fragments (FPKM) |              |              | Ref. |
|----------------------|-----------------|-------------|--------------------------------------------------------------------------|--------------|--------------|------|
|                      |                 |             | C                                                                        | M            | H            |      |
| chromate transporter | Clb.11_GM003029 | <i>ChrA</i> | 24.31±4.69                                                               | 16.82±2.37   | 14.45±2.84   | [1]  |
|                      | ----            | <i>ChrB</i> | ----                                                                     | ----         | ----         | [2]  |
| chromate reductase   | Clb.11_GM003425 | <i>ChrR</i> | 306.87±25.44                                                             | 207.07±17.22 | 254.94±19.22 | [3]  |
|                      | ----            | <i>YieF</i> | ----                                                                     | ----         | ----         | [4]  |
|                      | ----            | <i>FerB</i> | ----                                                                     | ----         | ----         | [5]  |
|                      | ----            | <i>NfsA</i> | ----                                                                     | ----         | ----         | [6]  |
|                      | ----            | <i>NfsB</i> | ----                                                                     | ----         | ----         |      |
|                      | ----            | <i>MtrC</i> | ----                                                                     | ----         | ----         | [7]  |
|                      | ----            | <i>OmcA</i> | ----                                                                     | ----         | ----         |      |
|                      | ----            | <i>NemA</i> | ----                                                                     | ----         | ----         | [8]  |
|                      | ----            | <i>AzoR</i> | ----                                                                     | ----         | ----         | [9]  |
|                      | ----            | <i>Frp</i>  | ----                                                                     | ----         | ----         |      |
|                      | ----            | <i>YcnD</i> | ----                                                                     | ----         | ----         |      |
|                      | ----            | <i>NfoR</i> | ----                                                                     | ----         | ----         | [10] |
|                      | ----            | <i>NitR</i> | ----                                                                     | ----         | ----         | [1]  |
|                      | ----            | <i>NfrA</i> | ----                                                                     | ----         | ----         | [11] |

Note: *C. fimi* strain Clb-11 with (C) 0 mM Cr(VI), (M) 0.2 mM Cr(VI), and (H) 0.5 mM Cr(VI) in the medium.

Table S9 Cytochrome-encoding gene transcriptional differential levels in *C. fimi* strain Clb-11

| ORF             | Gene name   | KO     | Gene product                                          | Fragments Per Kilobase of exon model per Million mapped fragments (FPKM) |                           |                            |
|-----------------|-------------|--------|-------------------------------------------------------|--------------------------------------------------------------------------|---------------------------|----------------------------|
|                 |             |        |                                                       | C                                                                        | M                         | H                          |
| Clb.11_GM001787 | <i>qcrB</i> | K03891 | ubiquinol-cytochrome c reductase cytochrome b subunit | 809.05±218.04 <sup>a</sup>                                               | 424.93±38.83 <sup>b</sup> | 1062.28±47.96 <sup>c</sup> |
| Clb.11_GM001485 | <i>cydA</i> | K00425 | cytochrome bd ubiquinol oxidase subunit I             | 618.25±132.07 <sup>a</sup>                                               | 370.89±21.30 <sup>b</sup> | 28.57±9.54 <sup>c</sup>    |
| Clb.11_GM001767 | <i>ccdA</i> | K06196 | cytochrome c-type biogenesis protein                  | 666.10±179.85 <sup>a</sup>                                               | 411.86±32.57 <sup>b</sup> | 915.06±34.45 <sup>c</sup>  |
| Clb.11_GM000996 | <i>ccdA</i> | K06196 | cytochrome c-type biogenesis protein                  | 128.58±22.90 <sup>a</sup>                                                | 84.12±3.99 <sup>b</sup>   | 95.82±3.74 <sup>b</sup>    |
| Clb.11_GM002325 | <i>ctaA</i> | K02259 | cytochrome c oxidase assembly protein subunit 15      | 107.72±8.83 <sup>a</sup>                                                 | 72.08±9.36 <sup>b</sup>   | 84.16±18.63 <sup>b</sup>   |
| Clb.11_GM001484 | <i>cydB</i> | K00426 | cytochrome bd ubiquinol oxidase subunit II            | 280.72±73.00 <sup>a</sup>                                                | 225.50±12.64 <sup>b</sup> | 15.45±8.47 <sup>c</sup>    |
| Clb.11_GM001788 | <i>qcrA</i> | K03890 | ubiquinol-cytochrome c reductase iron-sulfur subunit  | 683.15±277.64 <sup>a</sup>                                               | 567.42±30.03 <sup>a</sup> | 1115.50±37.26 <sup>b</sup> |
| Clb.11_GM001789 | <i>qcrC</i> | K03889 | ubiquinol-cytochrome c reductase cytochrome c subunit | 604.92±164.18 <sup>a</sup>                                               | 601.22±24.98 <sup>a</sup> | 1187.67±42.11 <sup>b</sup> |
| Clb.11_GM001766 | <i>ctaD</i> | K02274 | cytochrome c oxidase subunit I                        | 576.63±185.84 <sup>a</sup>                                               | 510.68±13.25 <sup>a</sup> | 877.51±43.35 <sup>b</sup>  |
| Clb.11_GM001790 | <i>ctaE</i> | K02276 | cytochrome c oxidase subunit III                      | 522.78±103.27 <sup>a</sup>                                               | 629.52±46.77 <sup>a</sup> | 1104.53±51.33 <sup>b</sup> |
| Clb.11_GM001765 | <i>ctaC</i> | K02275 | cytochrome c oxidase subunit II                       | 419.29±101.65 <sup>a</sup>                                               | 485.57±30.72 <sup>a</sup> | 786.58±57.49 <sup>b</sup>  |

Note: *C. fimi* strain Clb-11 with (C) 0 mM Cr(VI), (M) 0.2 mM Cr(VI), and (H) 0.5 mM Cr(VI) in the medium. The data in each row were analyzed for significant differences ( $P<0.05$ ).

1  
2  
3  
  
4  
5  
6  
7  
8  
9  
10  
11

Table S10 Upregulated genes related to phospholipid metabolism of *C. fimi* strain Clb-11 in the presence of 0.2 mM Cr(VI)

| ORF             | Gene name   | KO     | Gene product                                                                              |
|-----------------|-------------|--------|-------------------------------------------------------------------------------------------|
| Clb.11_GM002533 | <i>dhaM</i> | K05881 | phosphoenolpyruvate---glycerone phosphotransferase subunit DhaM                           |
| Clb.11_GM002534 | <i>dhaL</i> | K05879 | phosphoenolpyruvate---glycerone phosphotransferase subunit DhaL                           |
| Clb.11_GM002535 | <i>dhaK</i> | K05878 | phosphoenolpyruvate---glycerone phosphotransferase subunit DhaK                           |
| Clb.11_GM002750 | <i>bccA</i> | K11263 | acetyl-CoA/propionyl-CoA carboxylase, biotin carboxylase, biotin carboxyl carrier protein |

## References

- [1] Chai L, Ding C, Tang C, et al. Discerning three novel chromate reduce and transport genes of highly efficient *Pannonibacter phragmitetus* BB: From genome to gene and protein [J]. *Ecotoxicology and Environmental Safety*, 2018, 162:139-146.
- [2] Branco R, Morais P V. Identification and Characterization of the Transcriptional Regulator ChrB in the Chromate Resistance Determinant of *Ochrobactrum tritici* 5bv11 [J]. *PLoS ONE*, 2013, 8(11): 77987.
- [3] Eswaramoorthy S, Poulain S, Hienerwadel R, et al. Crystal Structure of ChrR—A Quinone Reductase with the Capacity to Reduce Chromate [J]. *PLoS ONE*, 2012, 7(4):36017.
- [4] Shahpiri A. Enhancement of chromate bioaccumulation by engineered *Escherichia coli* cells co-expressing chromate reductase (YieF) and a rice metallothionein isoform (OsMT1) [J]. *Journal of Chemical Technology & Biotechnology*, 2021, 96(5).
- [5] Mazoch J, R Tesaík, V Sedláek, et al. Isolation and biochemical characterization of two soluble iron(III) reductases from *Paracoccus denitrificans* [J]. *European Journal of Biochemistry*, 2004, 271.
- [6] Ackerley D F, Gonzalez C F, Keyhan M, et al. Mechanism of chromate reduction by the *Escherichia coli* protein, NfsA, and the role of different chromate reductases in minimizing oxidative stress during chromate reduction [J]. *Environmental Microbiology*, 2010, 6(8):851-860.
- [7] Belchik S M, Kennedy D W, Dohnalkova A C, et al. Extracellular Reduction of Hexavalent Chromium by Cytochromes MtrC and OmcA of *Shewanella oneidensis* MR-1 [J]. *Applied and Environmental Microbiology*, 2011, 77(12).
- [8] Robins KJ, Hooks DO, Rehm BHA, et al. *Escherichia coli* NemaA is an efficient chromate reductase that can be biologically immobilized to provide a cell-free system for remediation of hexavalent chromium [J]. *PLoS ONE*. 2013.
- [9] Thatoi H, Das S, Mishra J, et al. Bacterial chromate reductase, a potential enzyme for bioremediation of hexavalent chromium: a review [J]. *Journal of Environmental Management*, 2014, 146:383-399.
- [10] Han H, Song P, Cai Z, et al. Immobilizing chromate reductase NfoR on magnetic biochar reduced Cr(VI) in copper-containing wastewater [J]. *Journal of cleaner production*, 2022, 361.
- [11] Zheng Z, Li Y, Zhang X, et al. A *Bacillus subtilis* strain can reduce hexavalent chromium to

44 trivalent and nfrA gene is involved [J]. International Biodeterioration and Biodegradation. 2015; 97:  
45 90-96.  
46  
47
